# Supplementary material for: A β-cyclodextrin–resveratrol inclusion complex and the role of geometrical and electronic effects on its electronic induced circular dichroism
Source: Royal Society of Chemistry journal article supplement (doi:10.1039/c3ra41972j), 2013-01-01
Supplement: c3ra41972j.pdf [file c3ra41972j.pdf]

## Supplementary Information

# **$\beta$ -Cyclodextrin-Resveratrol inclusion complex and the role of geometrical and electronic effects on its electronic induced circular dichroism**

Eduardo Troche Pesqueira,<sup>a</sup> Ignacio Pérez-Juste,<sup>b</sup> Armando Navarro-Vázquez\*<sup>a</sup> and María Magdalena Cid\*<sup>a</sup>

<sup>a</sup>*Departamento de Química Orgánica, Edificio de Ciencias Experimentales, Campus Lagoas-Marcosende, Vigo, 36310 Spain. Fax: +34986812262; Tel: +34986813563; E-mail: [mcid@uvigo.es](mailto:mcid@uvigo.es); [armando.navarro@uvigo.es](mailto:armando.navarro@uvigo.es)*

<sup>b</sup>*Departamento de Química Física, Edificio de Ciencias Experimentales, Campus Lagoas-Marcosende, Vigo, 36310 Spain. Fax: +34986812262; Tel: +34986813563; E-mail: [uviqpij@uvigo.es](mailto:uviqpij@uvigo.es)*

## NMR spectra

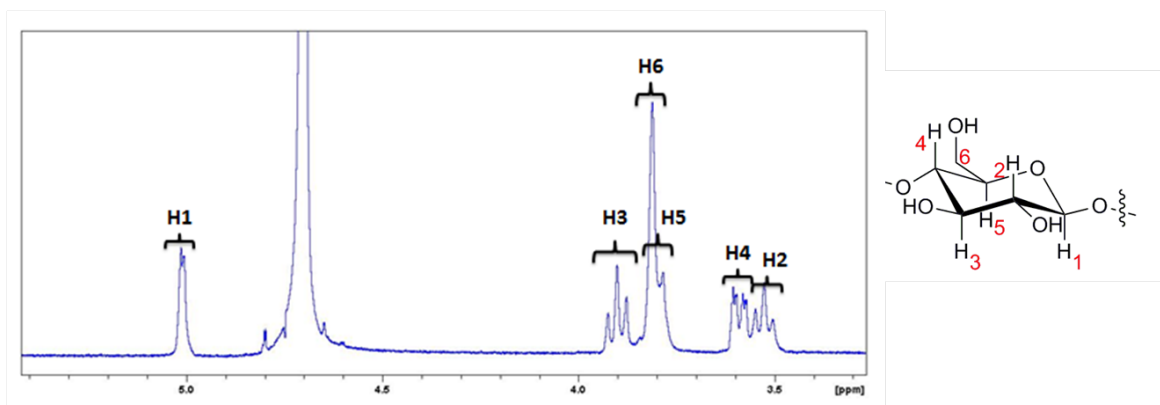

**Fig. 1** 1D <sup>1</sup>H annotated spectrum of β-cyclodextrin (D<sub>2</sub>O, 400 MHz).

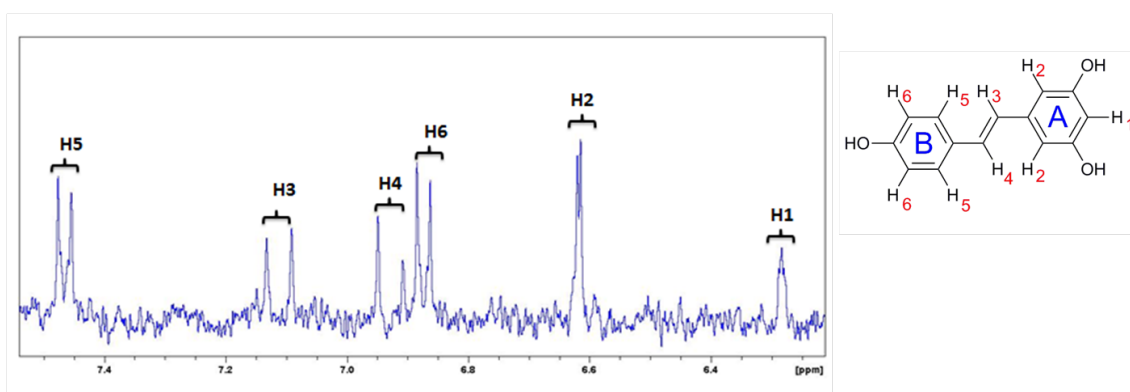

**Fig. 2** 1D <sup>1</sup>H annotated spectrum of resveratrol (D<sub>2</sub>O, 400 MHz).

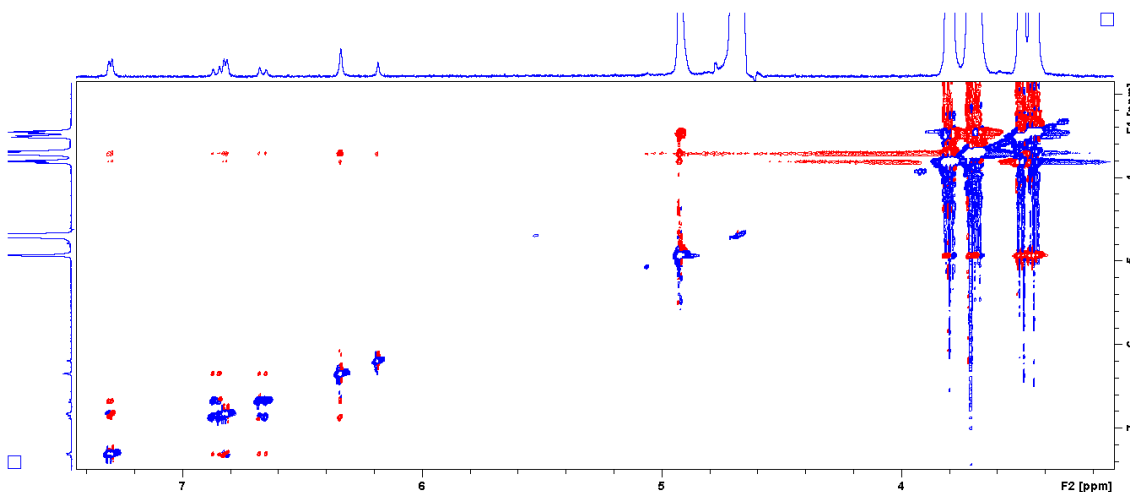

**Fig. 3** 2D T-ROESY spectrum (D<sub>2</sub>O, 600 MHz).

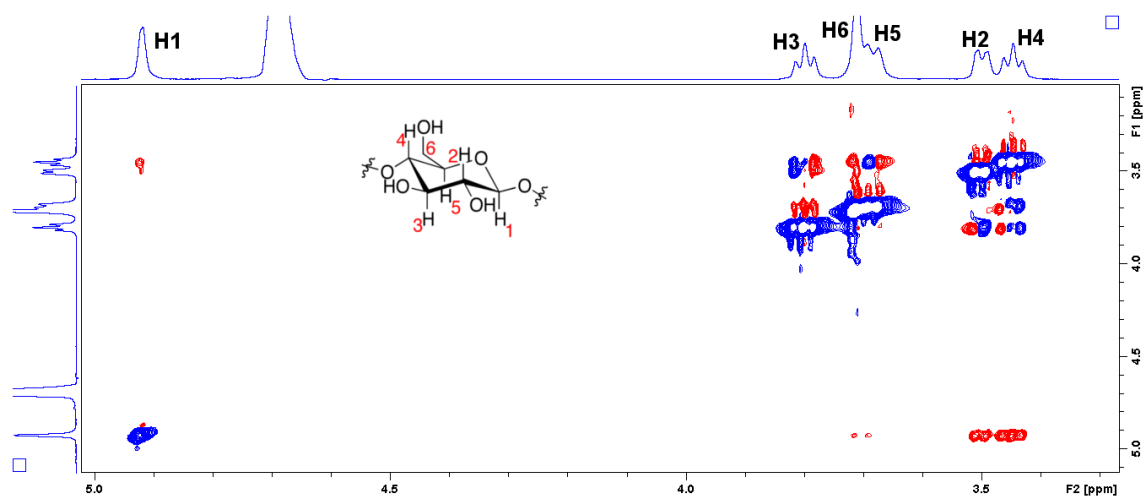

Fig. 4 2D T-ROESY annotated spectrum in the  $\beta$ -cyclodextrin region.

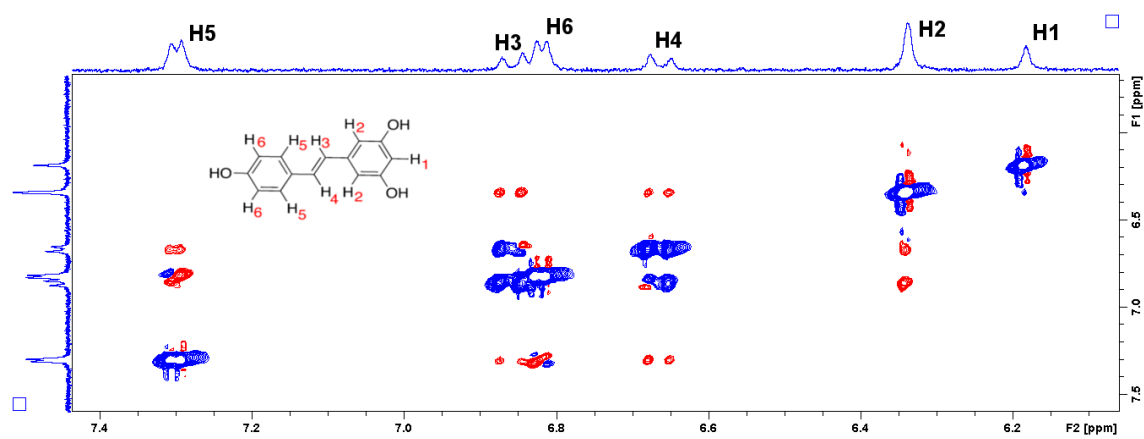

Fig. 5 2D T-ROESY annotated spectrum in the resveratrol region.

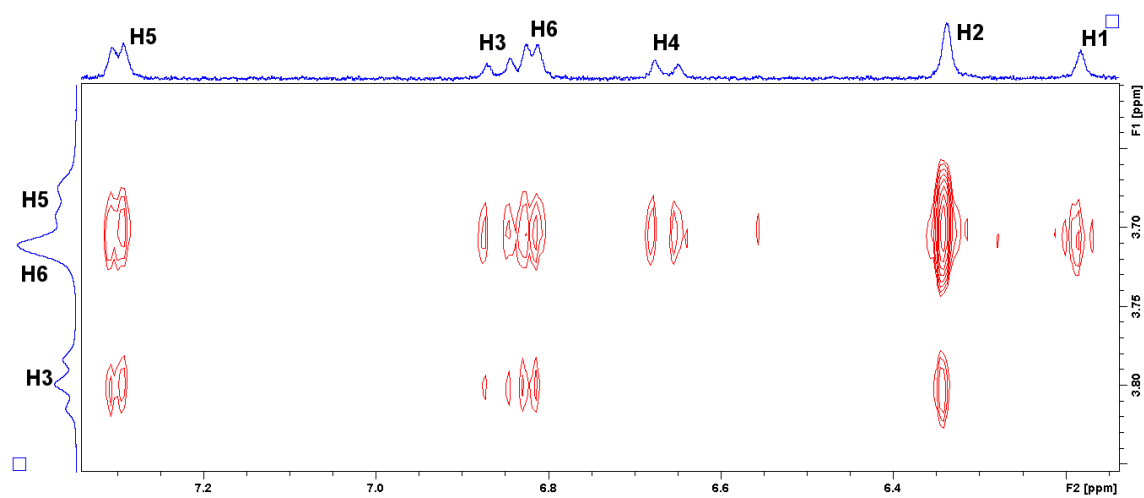

Fig. 6 2D T-ROESY annotated spectrum in the cross-peaks region between resveratrol (F2 dimension) and  $\beta$ -cyclodextrin (F1 dimension).

## Titration

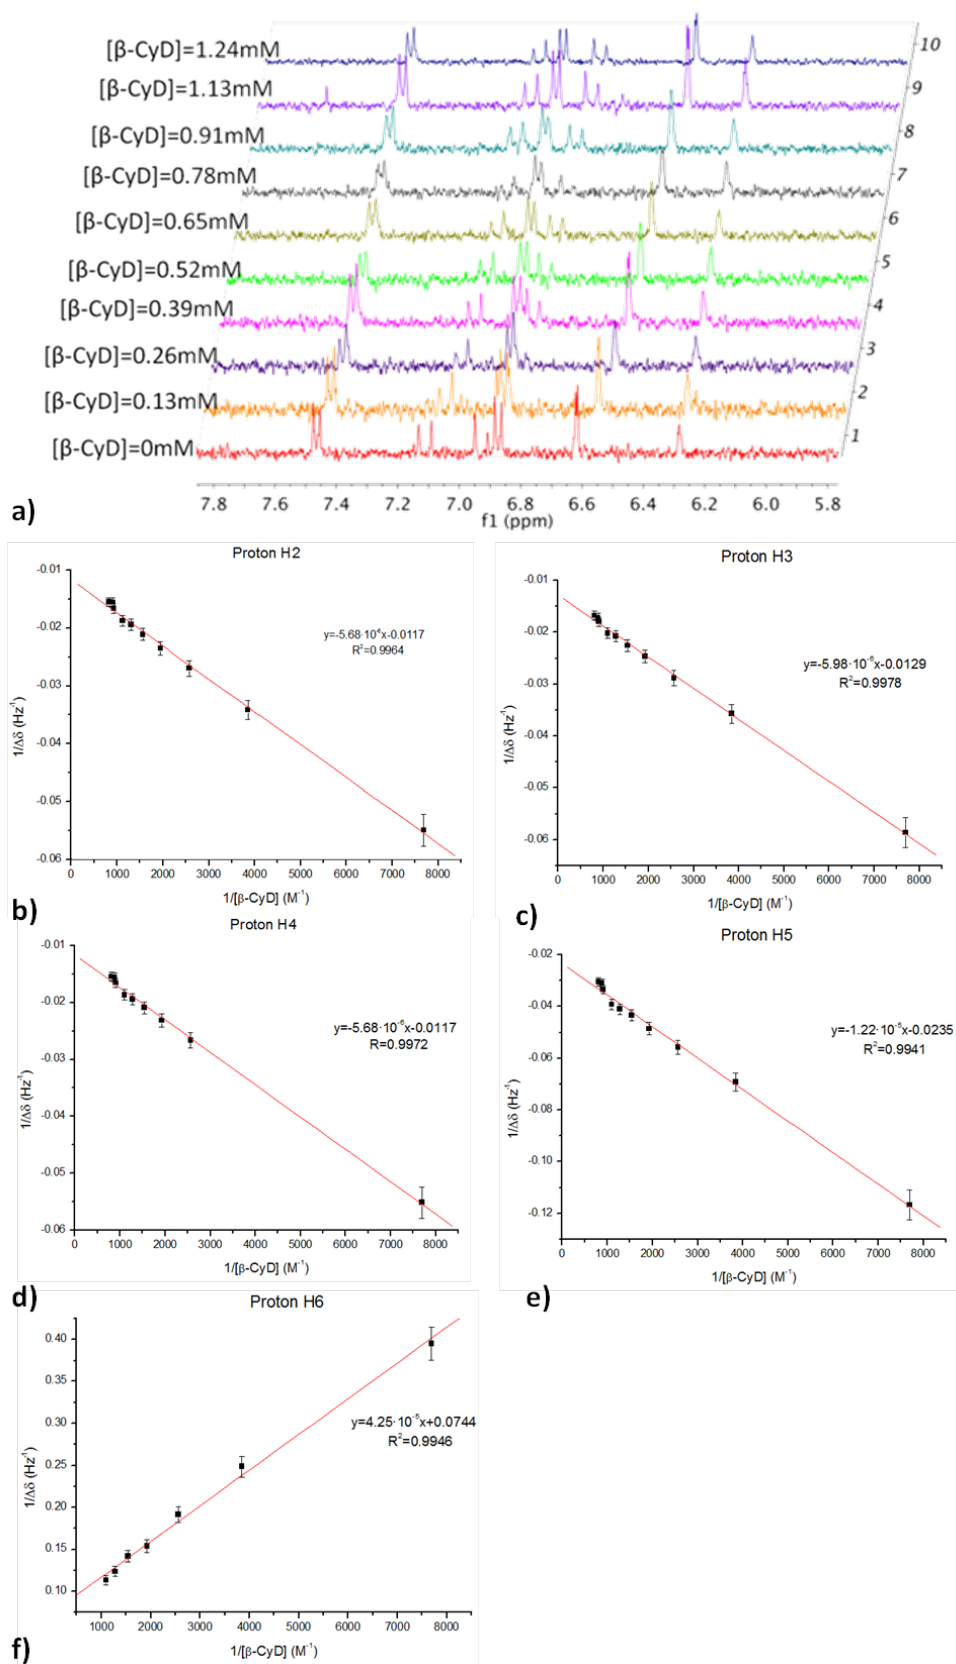

**Fig. 7** a) NMR titration of the  $\beta$ -cyclodextrin-resveratrol inclusion complex ( $\text{D}_2\text{O}$ , 400 MHz), and individual plots for protons b) H2, c) H3, d) H4, e) H5 and f) H6 of resveratrol, along with the equations for each fitting (error bars were estimated as a 5% of error for each measurement).

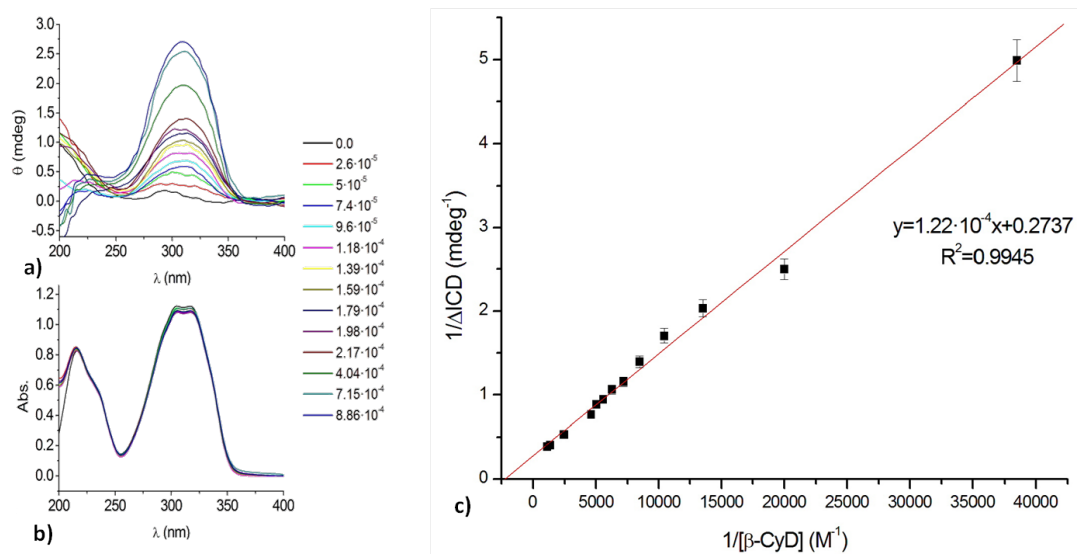

**Fig. 8** a) Circular Dichroism titration of the  $\beta$ -cyclodextrin-resveratrol inclusion complex, b) UV-vis spectra for each solution and c) plot of the inverse of the CD intensity at 308 nm vs. the inverse of the  $\beta$ -CyD concentration (error bars were estimated as a 5% of error for each measurement).

## $\beta$ -CyD crystallization

### Crystal data and structure refinement

|                                 |                                          |                            |
|---------------------------------|------------------------------------------|----------------------------|
| Identification code             | an14581s                                 |                            |
| Empirical formula               | C42 H70 O45                              |                            |
| Formula weight                  | 1294.98                                  |                            |
| Temperature                     | 293(2) K                                 |                            |
| Wavelength                      | 0.71073 Å                                |                            |
| Crystal system                  | Monoclinic                               |                            |
| Space group                     | P2(1)                                    |                            |
| Unit cell dimensions            | a = 15.1815(18) Å                        | $\alpha = 90^\circ$        |
|                                 | b = 10.2073(12) Å                        | $\beta = 110.803(2)^\circ$ |
|                                 | c = 21.019(2) Å                          | $\gamma = 90^\circ$        |
| Volume                          | 3044.8(6) Å <sup>3</sup>                 |                            |
| Z                               | 2                                        |                            |
| Density (calculated)            | 1.412 Mg/m <sup>3</sup>                  |                            |
| Absorption coefficient          | 0.131 mm <sup>-1</sup>                   |                            |
| F(000)                          | 1364                                     |                            |
| Crystal size                    | 0.52 x 0.48 x 0.36 mm <sup>3</sup>       |                            |
| Theta range for data collection | 1.43 to 27.95°.                          |                            |
| Index ranges                    | -19 ≤ h ≤ 19, -13 ≤ k ≤ 13, -19 ≤ l ≤ 27 |                            |
| Reflections collected           | 19843                                    |                            |
| Independent reflections         | 13372 [R(int) = 0.0206]                  |                            |

|                                   |                                             |
|-----------------------------------|---------------------------------------------|
| Completeness to theta = 27.95°    | 98.7 %                                      |
| Absorption correction             | Semi-empirical from equivalents             |
| Max. and min. Transmission        | 1.0000 and 0.9545                           |
| Refinement method                 | Full-matrix least-squares on F <sup>2</sup> |
| Data / restraints / parameters    | 13372 / 1 / 805                             |
| Goodness-of-fit on F <sup>2</sup> | 1.013                                       |
| Final R indices [I > 2sigma(I)]   | R1 = 0.0711, wR2 = 0.1980                   |
| R indices (all data)              | R1 = 0.0956, wR2 = 0.2280                   |
| Largest diff. peak and hole       | 1.593 and -0.504 e.Å <sup>-3</sup>          |

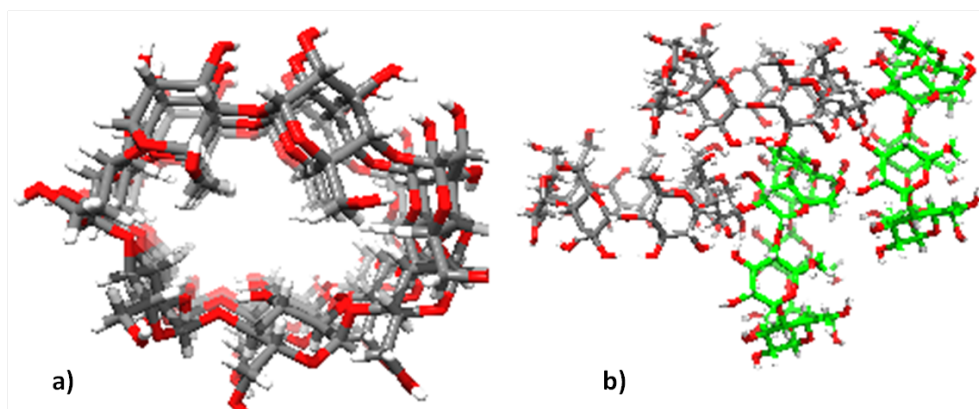

**Fig. 9**  $\beta$ -CyD channels and the two perpendicular arrangements.

### Molecular Dynamics

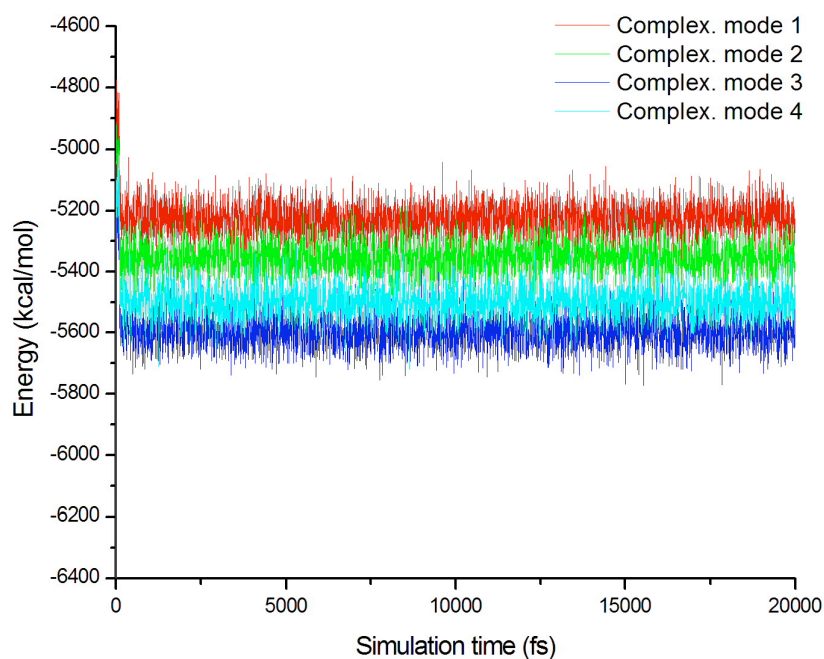

**Fig. 10** Comparison of the total Energy (kcal/mol) over the 20 ns of MD simulation for each of the possible inclusion modes.

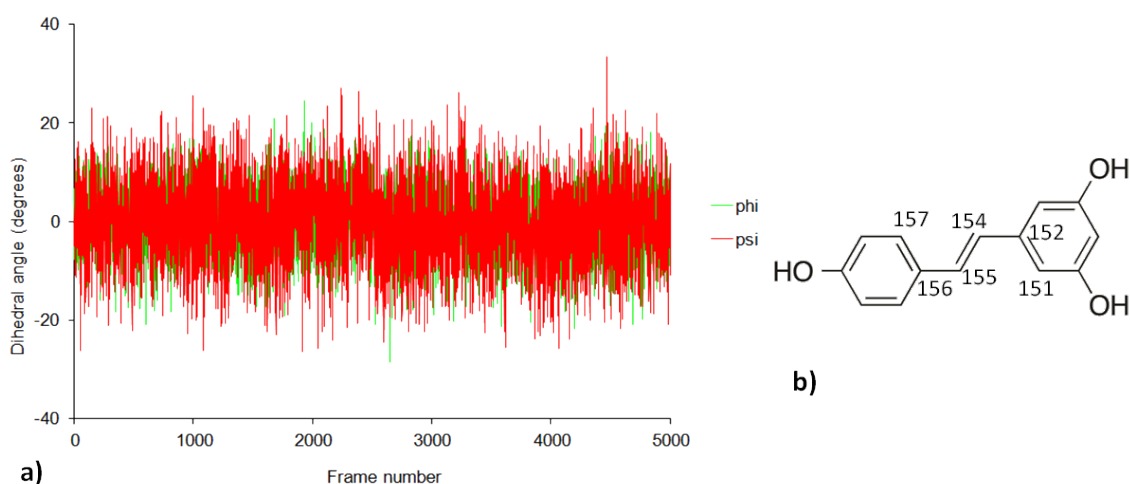

**Fig. 11** Variation of the dihedral angles of the alkene bond of resveratrol with each of the aromatic moieties where the phi angle is the one formed by atoms: 151, 152, 154 and 155 and psi is the one formed by: 157, 156, 155 and 154.

**Table 1** Most representative families of structures extracted from their MD runs by clustering them (in parenthesis the step number of the simulation), and their relative energies calculated at the CAM-B3LYP/SVP theory level.

Shaded conformations are depicted in the manuscript (Figure 6).

| Structure | $\Delta E$ | Structure | $\Delta E$ |
|-----------|------------|-----------|------------|
| a(411)    | 7.1        | b(436)    | 30.4       |
| a(1976)   | 4.6        | b(756)    | 19.2       |
| a(2381)   | 14.3       | b(1366)   | 31.2       |
| a(2716)   | 21.3       | b(1466)   | 34.9       |
| a(3116)   | 23.2       | b(2691)   | 23.3       |
| a(3661)   | 6.5        | b(4111)   | 5.8        |
| a(4591)   | 50.8       | b(4376)   | 14.3       |
| c(336)    | 12.7       | d(126)    | 13.6       |
| c(846)    | 26.0       | d(296)    | 1.5        |
| c(2926)   | 0.0        | d(816)    | 17.0       |
| c(3236)   | 9.4        | d(1051)   | 5.9        |
| c(3551)   | 16.7       | d(2041)   | 25.5       |
| c(3816)   | 22.8       | d(3051)   | 40.7       |
| c(4641)   | 18.3       | d(4356)   | 15.1       |

### Details of TD-DFT electronic circular dichroism computations for the functional comparison

Rotatory strengths were computed using the 6-31+G\* level and the IEFPCM solvation model with water parameters on CAM-B3LYP/6-31+G\* geometries. ECD spectrum was simulated by convoluting transitions with gaussian bands of 0.5 eV half-height full linewidth.

#### CAM-B3LYP

| Transition | $\lambda$ (nm) | Rotatory strength (length) <sup>a</sup> |
|------------|----------------|-----------------------------------------|
| 1          | 304.88         | 70.3821                                 |
| 2          | 272            | -7.0984                                 |
| 3          | 257.8          | 10.5935                                 |
| 4          | 226.17         | -4.8249                                 |
| 5          | 222.72         | 6.5274                                  |
| 6          | 216.12         | 23.4063                                 |
| 7          | 212.43         | 15.7362                                 |
| 8          | 210.74         | -36.4473                                |
| 9          | 207.59         | 42.8367                                 |
| 10         | 205.61         | 2.9915                                  |

a)  $10^{-40}$  erg.esu.cm/Gauss

#### B3LYP

| Transition | $\lambda$ (nm) | Rotatory strength (length) <sup>a</sup> |
|------------|----------------|-----------------------------------------|
| 1          | 332.9          | 66.0404                                 |
| 2          | 308.58         | -7.1342                                 |
| 3          | 279.14         | 9.2196                                  |
| 4          | 258.48         | 5.561                                   |
| 5          | 253.23         | 2.884                                   |
| 6          | 248.24         | -4.0155                                 |
| 7          | 245.46         | 3.5776                                  |
| 8          | 243.75         | -1.4229                                 |
| 9          | 243.06         | 1.983                                   |
| 10         | 241.82         | -0.0874                                 |



### OPBE

| Transition | $\lambda$ (nm) | Rotatory strength (length) <sup>a</sup> |
|------------|----------------|-----------------------------------------|
| 1          | 363.53         | 1.8354                                  |
| 2          | 354.84         | 60.3365                                 |
| 3          | 343.02         | -0.1252                                 |
| 4          | 336.40         | -0.5909                                 |
| 5          | 326.33         | -0.0383                                 |
| 6          | 325.12         | -0.1607                                 |
| 7          | 317.62         | -0.4211                                 |
| 8          | 313.75         | 0.3506                                  |
| 9          | 312.29         | 0.0459                                  |
| 10         | 307.72         | 0.6043                                  |

### M05

| Transition | $\lambda$ (nm) | Rotatory strength (length) <sup>a</sup> |
|------------|----------------|-----------------------------------------|
| 1          | 330.72         | 71.1038                                 |
| 2          | 297.83         | -7.2459                                 |
| 3          | 273.98         | 9.8375                                  |
| 4          | 249.78         | 7.0704                                  |
| 5          | 249.07         | 1.6106                                  |
| 6          | 243.05         | -5.598                                  |
| 7          | 239.27         | 6.4393                                  |
| 8          | 236.52         | 30.8278                                 |
| 9          | 234.81         | -27.4561                                |
| 10         | 233.12         | 4.5192                                  |

### M06L

| Transition | $\lambda$ (nm) | Rotatory strength (length) <sup>a</sup> |
|------------|----------------|-----------------------------------------|
| 1          | 346.61         | 62.3773                                 |
| 2          | 339.31         | -5.4645                                 |
| 3          | 308.99         | -0.0859                                 |
| 4          | 301.8          | 0.225                                   |
| 5          | 294.93         | -0.419                                  |
| 6          | 294.03         | 2.7184                                  |
| 7          | 292.38         | -0.0593                                 |
| 8          | 288.12         | 1.2921                                  |
| 9          | 285.84         | 0.7738                                  |
| 10         | 284.05         | 0.0654                                  |

**M06-2X**

| <b>Transition</b> | <b><math>\lambda</math> (nm)</b> | <b>Rotatory strength (length)<sup>a</sup></b> |
|-------------------|----------------------------------|-----------------------------------------------|
| 1                 | 306.04                           | 72.3112                                       |
| 2                 | 271.81                           | -6.9806                                       |
| 3                 | 256.86                           | 14.7474                                       |
| 4                 | 231.71                           | 2.2888                                        |
| 5                 | 225.18                           | 0.3401                                        |
| 6                 | 221.2                            | -16.2248                                      |
| 7                 | 217.93                           | 71.929                                        |
| 8                 | 213.81                           | -24.8837                                      |
| 9                 | 212.67                           | 23.5498                                       |
| 10                | 210.91                           | -22.2782                                      |

**Fig. 12 3D Cartesian coordinate of the DFT optimized<sup>1</sup> structures**

**Planar resveratrol (PL):**

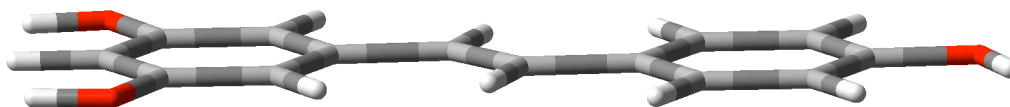

29

|   |           |           |           |
|---|-----------|-----------|-----------|
| C | 3.960321  | -1.110575 | 0.150174  |
| C | 4.487548  | 0.171669  | 0.007507  |
| C | 3.609465  | 1.246547  | -0.165402 |
| C | 2.234190  | 1.039040  | -0.218137 |
| C | 1.711360  | -0.249178 | -0.066560 |
| C | 2.585469  | -1.325914 | 0.113790  |
| C | 0.265347  | -0.512902 | -0.101171 |
| C | -0.695564 | 0.395647  | 0.115871  |
| C | -2.144997 | 0.181220  | 0.060723  |
| C | -2.734896 | -1.024845 | -0.349727 |
| C | -4.109562 | -1.175472 | -0.385624 |
| C | -4.938997 | -0.116113 | -0.011166 |
| C | -4.376739 | 1.091584  | 0.394110  |
| C | -2.995638 | 1.230990  | 0.425373  |
| O | -6.281447 | -0.322910 | -0.066999 |
| O | 4.063473  | 2.514007  | -0.318911 |
| O | 4.753018  | -2.203956 | 0.329872  |
| H | 2.210061  | -2.332794 | 0.258139  |
| H | -0.006553 | -1.542872 | -0.317206 |
| H | -0.403117 | 1.412299  | 0.372034  |
| H | -2.565369 | 2.177622  | 0.742886  |
| H | -5.017255 | 1.920823  | 0.682216  |
| H | -4.560807 | -2.108743 | -0.705870 |
| H | -2.116070 | -1.863352 | -0.653897 |
| H | 1.589652  | 1.894655  | -0.382647 |
| H | 5.560350  | 0.339670  | 0.031747  |
| H | -6.746316 | 0.480285  | 0.213277  |
| H | 4.944232  | 2.626323  | 0.114137  |
| H | 5.686992  | -1.951239 | 0.274917  |

SCF energy= -766.0248901 u.a.

<sup>1</sup> Both geometry optimizations and excited states TD-DFT calculations were performed at the theory level CAM-B3LYP/6-31+G\*.

**Twisted resveratrol (TW):**

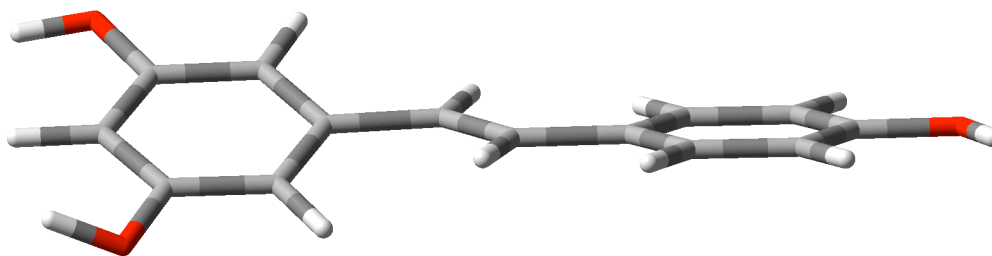

29

|   |           |           |           |
|---|-----------|-----------|-----------|
| C | 3.960321  | -1.110575 | 0.150174  |
| C | 4.487548  | 0.171669  | 0.007507  |
| C | 3.609465  | 1.246547  | -0.165402 |
| C | 2.234190  | 1.039040  | -0.218137 |
| C | 1.711360  | -0.249178 | -0.066560 |
| C | 2.585469  | -1.325914 | 0.113790  |
| C | 0.265347  | -0.512902 | -0.101171 |
| C | -0.695564 | 0.395647  | 0.115871  |
| C | -2.144997 | 0.181220  | 0.060723  |
| C | -2.734896 | -1.024845 | -0.349727 |
| C | -4.109562 | -1.175472 | -0.385624 |
| C | -4.938997 | -0.116113 | -0.011166 |
| C | -4.376739 | 1.091584  | 0.394110  |
| C | -2.995638 | 1.230990  | 0.425373  |
| O | -6.281447 | -0.322910 | -0.066999 |
| O | 4.063473  | 2.514007  | -0.318911 |
| O | 4.753018  | -2.203956 | 0.329872  |
| H | 2.210061  | -2.332794 | 0.258139  |
| H | -0.006553 | -1.542872 | -0.317206 |
| H | -0.403117 | 1.412299  | 0.372034  |
| H | -2.565369 | 2.177622  | 0.742886  |
| H | -5.017255 | 1.920823  | 0.682216  |
| H | -4.560807 | -2.108743 | -0.705870 |
| H | -2.116070 | -1.863352 | -0.653897 |
| H | 1.589652  | 1.894655  | -0.382647 |
| H | 5.560350  | 0.339670  | 0.031747  |
| H | -6.746316 | 0.480285  | 0.213277  |
| H | 4.944232  | 2.626323  | 0.114137  |
| H | 5.686992  | -1.951239 | 0.274917  |

SCF energy = -766.0233507 u.a.

**Mirror twisted resveratrol (TWm):**

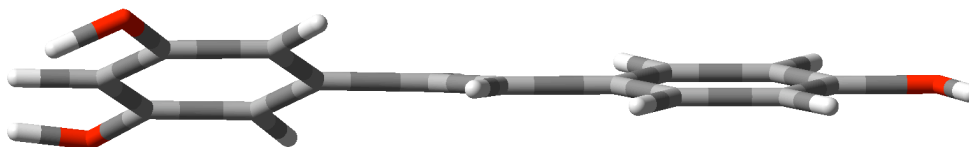

29

|   |          |          |          |
|---|----------|----------|----------|
| C | -3.96032 | 1.11058  | -0.15017 |
| C | -4.48755 | -0.17167 | -0.00751 |
| C | -3.60947 | -1.24655 | 0.1654   |
| C | -2.23419 | -1.03904 | 0.21814  |
| C | -1.71136 | 0.24918  | 0.06656  |
| C | -2.58547 | 1.32591  | -0.11379 |
| C | -0.26535 | 0.5129   | 0.10117  |
| C | 0.69556  | -0.39565 | -0.11587 |
| C | 2.145    | -0.18122 | -0.06072 |
| C | 2.7349   | 1.02485  | 0.34973  |
| C | 4.10956  | 1.17547  | 0.38562  |
| C | 4.939    | 0.11611  | 0.01117  |
| C | 4.37674  | -1.09158 | -0.39411 |
| C | 2.99564  | -1.23099 | -0.42537 |
| O | 6.28145  | 0.32291  | 0.067    |
| O | -4.06347 | -2.51401 | 0.31891  |
| O | -4.75302 | 2.20396  | -0.32987 |
| H | -2.21006 | 2.33279  | -0.25814 |
| H | 0.00655  | 1.54287  | 0.31721  |
| H | 0.40312  | -1.4123  | -0.37203 |
| H | 2.56537  | -2.17762 | -0.74289 |
| H | 5.01725  | -1.92082 | -0.68222 |
| H | 4.56081  | 2.10874  | 0.70587  |
| H | 2.11607  | 1.86335  | 0.6539   |
| H | -1.58965 | -1.89466 | 0.38265  |
| H | -5.56035 | -0.33967 | -0.03175 |
| H | 6.74632  | -0.48029 | -0.21328 |
| H | -4.94423 | -2.62632 | -0.11414 |
| H | -5.68699 | 1.95124  | -0.27492 |

SCF energy =-766.0233507 u.a.

**Inclusion complex with planar resveratrol (CPL):**

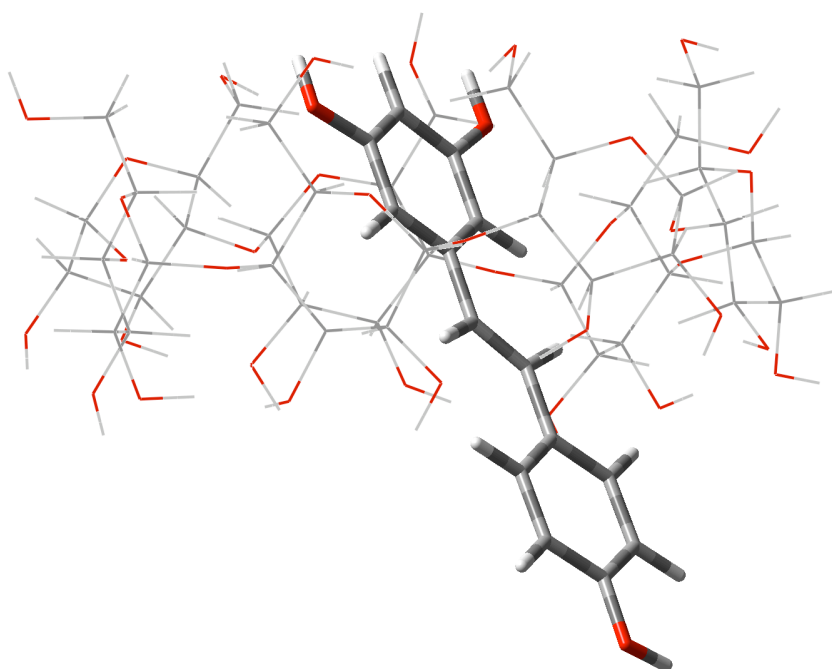

176

|   |           |           |           |
|---|-----------|-----------|-----------|
| C | 2.546391  | 5.565248  | 0.200379  |
| C | 1.811706  | 6.127357  | 1.412393  |
| O | 2.623379  | 5.950854  | 2.559721  |
| C | 0.473312  | 5.436826  | 1.576291  |
| O | -0.171339 | 6.030106  | 2.680939  |
| C | -0.340740 | 5.557481  | 0.293028  |
| O | -1.496662 | 4.747734  | 0.439885  |
| C | 0.473529  | 5.036557  | -0.894685 |
| O | 1.742830  | 5.702539  | -0.955740 |
| C | -0.198750 | 5.260987  | -2.229619 |
| O | 0.383593  | 4.352984  | -3.171926 |
| C | -2.748387 | 5.363671  | 0.591060  |
| C | -3.482422 | 4.696601  | 1.753492  |
| O | -2.694741 | 4.818645  | 2.926763  |
| C | -3.769954 | 3.242312  | 1.427104  |
| O | -4.525032 | 2.697095  | 2.491072  |
| C | -4.504212 | 3.151298  | 0.099864  |
| O | -4.604243 | 1.765647  | -0.202980 |
| C | -3.739520 | 3.895646  | -0.996041 |
| O | -3.516476 | 5.251586  | -0.579395 |
| C | -4.469745 | 3.923467  | -2.319401 |
| O | -5.811617 | 4.334240  | -2.111256 |
| C | -5.815912 | 1.264354  | -0.708615 |
| C | -6.340316 | 0.195451  | 0.260899  |
| O | -6.397986 | 0.718607  | 1.584817  |
| C | -5.427840 | -1.017148 | 0.266603  |
| O | -6.045744 | -2.060897 | 0.983941  |
| C | -5.098093 | -1.471997 | -1.153647 |
| O | -4.073582 | -2.443370 | -0.995281 |
| C | -4.634317 | -0.315913 | -2.032019 |
| O | -5.629434 | 0.715019  | -1.987454 |

|   |           |           |           |
|---|-----------|-----------|-----------|
| C | -4.468812 | -0.662490 | -3.501063 |
| O | -4.148508 | 0.496275  | -4.250943 |
| C | -4.139502 | -3.645736 | -1.706969 |
| C | -3.985936 | -4.800024 | -0.721359 |
| O | -4.965754 | -4.678186 | 0.295745  |
| C | -2.591727 | -4.806206 | -0.123086 |
| O | -2.510451 | -5.954817 | 0.696005  |
| C | -1.535219 | -4.785730 | -1.223625 |
| O | -0.253765 | -4.642690 | -0.616243 |
| C | -1.797476 | -3.602332 | -2.158431 |
| O | -3.127527 | -3.717870 | -2.677545 |
| C | -0.867418 | -3.524857 | -3.355419 |
| O | -1.004055 | -2.299309 | -4.054600 |
| C | 0.514852  | -5.800816 | -0.458067 |
| C | 1.067424  | -5.861329 | 0.967534  |
| O | -0.007035 | -5.766410 | 1.885056  |
| C | 2.070775  | -4.744272 | 1.203948  |
| O | 2.619542  | -4.825520 | 2.515542  |
| C | 3.144923  | -4.703098 | 0.122541  |
| O | 3.865019  | -3.498278 | 0.315540  |
| C | 2.485948  | -4.716112 | -1.257483 |
| O | 1.592250  | -5.830509 | -1.362884 |
| C | 3.450974  | -4.861360 | -2.416888 |
| O | 2.750439  | -4.821557 | -3.645427 |
| C | 5.278125  | -3.515702 | 0.343804  |
| C | 5.722470  | -2.905560 | 1.666141  |
| O | 5.201889  | -3.591787 | 2.785362  |
| C | 5.351922  | -1.427877 | 1.729270  |
| O | 5.862744  | -0.874516 | 2.924805  |
| C | 5.901879  | -0.686063 | 0.522693  |
| O | 5.376461  | 0.634705  | 0.577428  |
| C | 5.461596  | -1.404223 | -0.767499 |
| O | 5.819776  | -2.795853 | -0.724139 |
| C | 6.083087  | -0.842823 | -2.027481 |
| O | 7.493226  | -0.774894 | -1.864839 |
| C | 6.104394  | 1.685637  | 0.000893  |
| C | 6.254392  | 2.824127  | 1.010413  |
| O | 6.943647  | 2.373543  | 2.153456  |
| C | 4.884381  | 3.374496  | 1.364972  |
| O | 5.078502  | 4.468831  | 2.239110  |
| C | 4.171291  | 3.789426  | 0.091200  |
| O | 2.861832  | 4.228530  | 0.438042  |
| C | 4.107272  | 2.636794  | -0.904033 |
| O | 5.448303  | 2.189558  | -1.148002 |
| C | 3.472219  | 3.032627  | -2.236106 |
| O | 3.752905  | 4.359862  | -2.643150 |
| H | 3.447542  | 6.148322  | -0.004236 |
| H | 4.723536  | 4.608871  | -0.378901 |
| H | 3.531483  | 1.806534  | -0.479108 |
| H | 2.392631  | 2.875511  | -2.173893 |
| H | 3.860036  | 2.352200  | -3.001635 |
| H | 7.078099  | 1.332242  | -0.346647 |
| H | 6.823093  | 3.621785  | 0.509099  |
| H | 4.304680  | 2.582964  | 1.859192  |
| H | 6.994830  | -0.659300 | 0.577604  |
| H | 4.374371  | -1.315702 | -0.866402 |

|   |           |           |           |
|---|-----------|-----------|-----------|
| H | 5.812270  | -1.504456 | -2.860740 |
| H | 5.659576  | 0.147901  | -2.216150 |
| H | 5.644804  | -4.540759 | 0.241163  |
| H | 6.811750  | -2.990685 | 1.730774  |
| H | 4.255121  | -1.340262 | 1.706605  |
| H | 3.811214  | -5.570557 | 0.222636  |
| H | 1.925013  | -3.785702 | -1.389656 |
| H | 4.160258  | -4.031239 | -2.412148 |
| H | 4.014125  | -5.799720 | -2.308716 |
| H | -0.079978 | -6.692176 | -0.669258 |
| H | 1.570412  | -6.832497 | 1.073347  |
| H | 1.533584  | -3.792932 | 1.185739  |
| H | -1.577013 | -5.719975 | -1.797299 |
| H | -1.709766 | -2.673563 | -1.582592 |
| H | 0.167890  | -3.690070 | -3.038062 |
| H | -1.134021 | -4.315518 | -4.062747 |
| H | -5.085326 | -3.723083 | -2.250153 |
| H | -4.134188 | -5.736853 | -1.274780 |
| H | -2.466714 | -3.895290 | 0.477581  |
| H | -5.992934 | -1.932976 | -1.591398 |
| H | -3.685973 | 0.077773  | -1.653245 |
| H | -5.391409 | -1.130190 | -3.875586 |
| H | -3.645252 | -1.368736 | -3.625505 |
| H | -6.537965 | 2.074328  | -0.834934 |
| H | -7.338235 | -0.116086 | -0.065697 |
| H | -4.481244 | -0.725700 | 0.741282  |
| H | -5.501991 | 3.587577  | 0.208334  |
| H | -2.776445 | 3.403203  | -1.162651 |
| H | -4.421704 | 2.917890  | -2.751622 |
| H | -3.941788 | 4.611786  | -2.992207 |
| H | -2.631084 | 6.434833  | 0.775012  |
| H | -4.436857 | 5.221141  | 1.889042  |
| H | -2.809934 | 2.715527  | 1.331394  |
| H | -0.622157 | 6.605281  | 0.130078  |
| H | 0.629366  | 3.961262  | -0.751577 |
| H | -1.274244 | 5.085906  | -2.137948 |
| H | -0.033127 | 6.295000  | -2.546352 |
| H | 0.652627  | 4.368585  | 1.759144  |
| H | 1.639242  | 7.197265  | 1.234932  |
| H | 0.366020  | -5.699101 | 2.778791  |
| H | -4.679425 | -5.274535 | 1.008892  |
| H | -5.044109 | 1.938104  | 2.148589  |
| H | 5.652011  | -1.531570 | 3.609984  |
| H | 3.099430  | -5.666766 | 2.604094  |
| H | 2.070135  | -5.511120 | -3.586235 |
| H | -3.076635 | 4.227356  | 3.595315  |
| H | -4.871073 | 1.122577  | -4.089390 |
| H | 0.242127  | 4.695181  | -4.067488 |
| H | -7.234895 | 1.193803  | 1.698289  |
| H | -6.273009 | 4.286250  | -2.960549 |
| H | -0.980155 | 5.512309  | 2.878160  |
| H | 6.809059  | 3.061349  | 2.825691  |
| H | -0.631876 | -1.594378 | -3.500796 |
| H | 4.242105  | -3.730690 | 2.647769  |
| H | -5.522099 | -2.874797 | 0.832044  |
| H | -1.727461 | -5.863085 | 1.275573  |



|   |           |           |           |
|---|-----------|-----------|-----------|
| H | 4.200612  | 4.835545  | 2.470056  |
| H | 3.013106  | 4.909469  | -2.327828 |
| H | 7.860256  | -0.344124 | -2.649801 |
| H | 2.034185  | 6.044118  | 3.327315  |
| C | 1.326259  | -0.445291 | -1.986463 |
| C | 0.757394  | 0.719885  | -2.497293 |
| C | -0.313886 | 1.302459  | -1.809653 |
| C | -0.824654 | 0.713903  | -0.658698 |
| C | -0.272926 | -0.475279 | -0.170118 |
| C | 0.819405  | -1.039712 | -0.835266 |
| C | -0.781512 | -1.156035 | 1.028612  |
| C | -1.833702 | -0.776042 | 1.766807  |
| C | -2.361207 | -1.435572 | 2.964791  |
| C | -1.786213 | -2.580309 | 3.539861  |
| C | -2.314359 | -3.151094 | 4.683867  |
| C | -3.439133 | -2.588351 | 5.291225  |
| C | -4.020151 | -1.446716 | 4.745772  |
| C | -3.481615 | -0.883970 | 3.596936  |
| O | -3.911624 | -3.190687 | 6.414342  |
| O | -0.940926 | 2.409865  | -2.282441 |
| O | 2.420704  | -1.027933 | -2.550909 |
| H | 1.306856  | -1.926569 | -0.447794 |
| H | -0.259846 | -2.076300 | 1.280268  |
| H | -2.401116 | 0.099264  | 1.457068  |
| H | -3.930186 | 0.019296  | 3.191897  |
| H | -4.893551 | -1.002884 | 5.215547  |
| H | -1.867265 | -4.036006 | 5.124293  |
| H | -0.930043 | -3.056945 | 3.072510  |
| H | -1.674097 | 1.185312  | -0.179336 |
| H | 1.164467  | 1.197544  | -3.383677 |
| H | -4.690441 | -2.711845 | 6.737094  |
| H | -0.306668 | 3.021581  | -2.724892 |
| H | 2.719480  | -0.506564 | -3.311964 |

SCF energy=-5039.8415008 u.a.

**Inclusion complex with twisted resveratrol (CTW):**

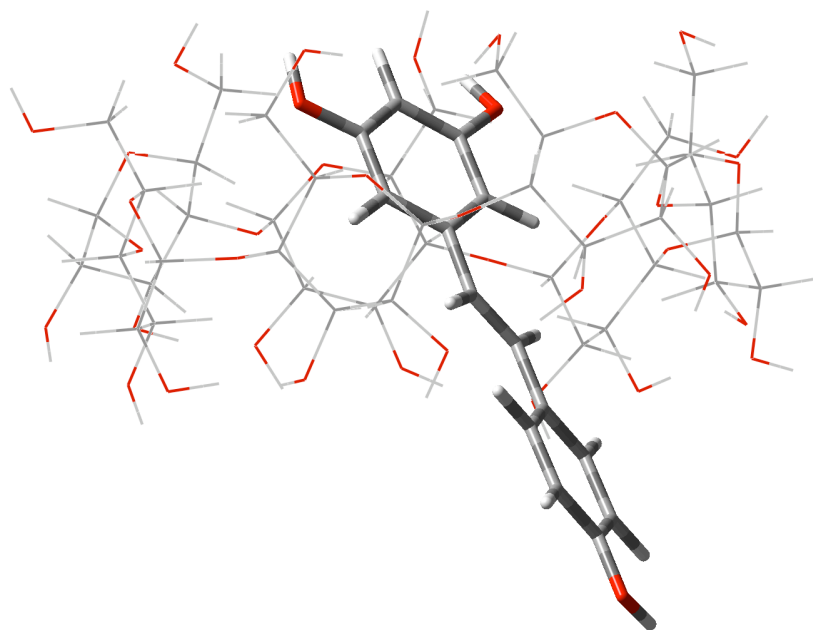

176

|   |           |           |           |
|---|-----------|-----------|-----------|
| C | 3.739625  | 4.938615  | 0.074847  |
| C | 3.173076  | 5.611780  | 1.323578  |
| O | 3.972794  | 5.288711  | 2.448531  |
| C | 1.738867  | 5.172728  | 1.541886  |
| O | 1.263933  | 5.853809  | 2.683406  |
| C | 0.906643  | 5.461625  | 0.299221  |
| O | -0.375849 | 4.880888  | 0.482349  |
| C | 1.566741  | 4.826938  | -0.928771 |
| O | 2.927673  | 5.251943  | -1.031262 |
| C | 0.887564  | 5.210114  | -2.225124 |
| O | 1.180184  | 4.204890  | -3.203964 |
| C | -1.463613 | 5.723219  | 0.757538  |
| C | -2.249579 | 5.144469  | 1.933320  |
| O | -1.383501 | 5.016929  | 3.048923  |
| C | -2.861292 | 3.808562  | 1.552095  |
| O | -3.642189 | 3.361837  | 2.643698  |
| C | -3.683126 | 3.967105  | 0.283532  |
| O | -4.105363 | 2.660171  | -0.084399 |
| C | -2.840645 | 4.600338  | -0.825215 |
| O | -2.307957 | 5.849012  | -0.358136 |
| C | -3.623198 | 4.866345  | -2.090855 |
| O | -4.828646 | 5.541537  | -1.768330 |
| C | -5.429576 | 2.465223  | -0.513596 |
| C | -6.110679 | 1.477050  | 0.443833  |
| O | -5.970415 | 1.920251  | 1.790415  |
| C | -5.483095 | 0.099715  | 0.330262  |
| O | -6.270021 | -0.830688 | 1.039360  |
| C | -5.342377 | -0.330816 | -1.128371 |
| O | -4.522308 | -1.490147 | -1.083236 |
| C | -4.713181 | 0.753681  | -1.995017 |
| O | -5.455686 | 1.967207  | -1.826791 |

|   |           |           |           |
|---|-----------|-----------|-----------|
| C | -4.735659 | 0.457510  | -3.483913 |
| O | -4.230361 | 1.556969  | -4.219412 |
| C | -4.834081 | -2.598842 | -1.878686 |
| C | -4.974927 | -3.819244 | -0.974155 |
| O | -5.940997 | -3.546853 | 0.027108  |
| C | -3.639594 | -4.162384 | -0.341609 |
| O | -3.837284 | -5.347405 | 0.403647  |
| C | -2.553710 | -4.301467 | -1.403927 |
| O | -1.294936 | -4.442530 | -0.749607 |
| C | -2.524225 | -3.043878 | -2.276276 |
| O | -3.828657 | -2.832863 | -2.829780 |
| C | -1.557671 | -3.115480 | -3.445298 |
| O | -1.368943 | -1.851170 | -4.056679 |
| C | -0.800384 | -5.739898 | -0.575990 |
| C | -0.346315 | -5.927829 | 0.873184  |
| O | -1.421334 | -5.615088 | 1.741593  |
| C | 0.854349  | -5.046708 | 1.176698  |
| O | 1.300284  | -5.242301 | 2.514259  |
| C | 1.970374  | -5.224495 | 0.153127  |
| O | 2.909662  | -4.191419 | 0.396377  |
| C | 1.395843  | -5.092967 | -1.257923 |
| O | 0.292335  | -5.990828 | -1.425942 |
| C | 2.366565  | -5.437825 | -2.369066 |
| O | 1.760087  | -5.233215 | -3.630735 |
| C | 4.280116  | -4.500681 | 0.553104  |
| C | 4.737435  | -3.900386 | 1.875904  |
| O | 4.004463  | -4.385301 | 2.980925  |
| C | 4.680846  | -2.376652 | 1.820989  |
| O | 5.172564  | -1.851943 | 3.036676  |
| C | 5.500376  | -1.870970 | 0.645826  |
| O | 5.308322  | -0.464697 | 0.563332  |
| C | 5.019157  | -2.563241 | -0.643441 |
| O | 5.047286  | -3.993429 | -0.498630 |
| C | 5.851696  | -2.235679 | -1.863096 |
| O | 7.222676  | -2.478250 | -1.577474 |
| C | 6.341393  | 0.325877  | 0.032388  |
| C | 6.740846  | 1.408296  | 1.031794  |
| O | 7.240932  | 0.824180  | 2.212323  |
| C | 5.542742  | 2.294234  | 1.313830  |
| O | 5.965095  | 3.296327  | 2.216490  |
| C | 5.027671  | 2.881674  | 0.010967  |
| O | 3.806227  | 3.559184  | 0.289446  |
| C | 4.779464  | 1.796625  | -1.039966 |
| O | 5.931188  | 0.955173  | -1.163217 |
| C | 4.495005  | 2.378113  | -2.409445 |
| O | 5.551195  | 3.253612  | -2.771596 |
| H | 4.727654  | 5.339554  | -0.165159 |
| H | 5.766460  | 3.587908  | -0.379400 |
| H | 3.916159  | 1.192785  | -0.735024 |
| H | 3.537025  | 2.908130  | -2.376254 |
| H | 4.408602  | 1.550916  | -3.126934 |
| H | 7.195914  | -0.297456 | -0.240689 |
| H | 7.517628  | 2.019250  | 0.547629  |
| H | 4.751426  | 1.678439  | 1.762028  |
| H | 6.557489  | -2.096777 | 0.818292  |
| H | 3.993569  | -2.240435 | -0.850600 |

|   |           |           |           |
|---|-----------|-----------|-----------|
| H | 5.503387  | -2.866580 | -2.691317 |
| H | 5.682043  | -1.187857 | -2.129517 |
| H | 4.424117  | -5.584553 | 0.542795  |
| H | 5.777567  | -4.198788 | 2.041320  |
| H | 3.636346  | -2.066218 | 1.667527  |
| H | 2.441246  | -6.209677 | 0.273669  |
| H | 1.051588  | -4.063500 | -1.401636 |
| H | 3.241640  | -4.787443 | -2.311526 |
| H | 2.700790  | -6.478724 | -2.250129 |
| H | -1.559047 | -6.481560 | -0.834818 |
| H | -0.065905 | -6.983888 | 0.986967  |
| H | 0.532637  | -4.003512 | 1.143452  |
| H | -2.753324 | -5.180020 | -2.029852 |
| H | -2.253276 | -2.188679 | -1.646658 |
| H | -0.605898 | -3.548547 | -3.117606 |
| H | -1.979865 | -3.771257 | -4.212271 |
| H | -5.753378 | -2.424729 | -2.444468 |
| H | -5.302865 | -4.664884 | -1.593085 |
| H | -3.352118 | -3.336027 | 0.321312  |
| H | -6.337841 | -0.584740 | -1.515332 |
| H | -3.676546 | 0.915040  | -1.685306 |
| H | -5.761300 | 0.212539  | -3.796977 |
| H | -4.092169 | -0.399635 | -3.695058 |
| H | -5.962415 | 3.418478  | -0.545556 |
| H | -7.170832 | 1.405289  | 0.178195  |
| H | -4.470051 | 0.155153  | 0.752028  |
| H | -4.551335 | 4.600638  | 0.489385  |
| H | -2.017969 | 3.925500  | -1.081675 |
| H | -3.821795 | 3.903600  | -2.574937 |
| H | -2.997942 | 5.466634  | -2.764559 |
| H | -1.118112 | 6.734105  | 0.989618  |
| H | -3.060092 | 5.846245  | 2.168483  |
| H | -2.045150 | 3.100500  | 1.350750  |
| H | 0.819032  | 6.546300  | 0.158352  |
| H | 1.525434  | 3.736886  | -0.815907 |
| H | -0.192453 | 5.288972  | -2.069986 |
| H | 1.270116  | 6.180827  | -2.554045 |
| H | 1.728606  | 4.087110  | 1.708353  |
| H | 3.190885  | 6.696824  | 1.155740  |
| H | -1.082144 | -5.621431 | 2.651548  |
| H | -5.824516 | -4.241857 | 0.697972  |
| H | -4.331806 | 2.750000  | 2.306900  |
| H | 4.762961  | -2.403459 | 3.725143  |
| H | 1.607910  | -6.159481 | 2.612984  |
| H | 0.943428  | -5.757429 | -3.622204 |
| H | -1.843741 | 4.482292  | 3.715627  |
| H | -4.784087 | 2.314792  | -3.975137 |
| H | 1.052714  | 4.583142  | -4.087205 |
| H | -6.661999 | 2.572098  | 1.980223  |
| H | -5.337235 | 5.649959  | -2.584510 |
| H | 0.399000  | 5.465701  | 2.932018  |
| H | 7.209111  | 1.528089  | 2.881008  |
| H | -0.847224 | -1.300419 | -3.451417 |
| H | 3.051980  | -4.386965 | 2.753761  |
| H | -5.978217 | -1.727875 | 0.775933  |
| H | -3.099194 | -5.434425 | 1.039636  |

|   |           |           |           |
|---|-----------|-----------|-----------|
| H | 5.201244  | 3.880665  | 2.405600  |
| H | 5.261965  | 3.761259  | -3.542528 |
| H | 7.738831  | -2.193711 | -2.345113 |
| H | 3.420968  | 5.469049  | 3.229009  |
| C | 1.333177  | -0.523792 | -1.942276 |
| C | 0.877910  | 0.666978  | -2.505545 |
| C | -0.232741 | 1.300104  | -1.938186 |
| C | -0.887922 | 0.740650  | -0.845039 |
| C | -0.421218 | -0.450412 | -0.279893 |
| C | 0.693431  | -1.083047 | -0.839611 |
| C | -1.073166 | -1.069428 | 0.883501  |
| C | -1.874513 | -0.437916 | 1.752382  |
| C | -2.566830 | -1.023646 | 2.904551  |
| C | -2.565916 | -2.397678 | 3.192780  |
| C | -3.237154 | -2.900455 | 4.292934  |
| C | -3.934723 | -2.037424 | 5.140873  |
| C | -3.954523 | -0.671328 | 4.871977  |
| C | -3.277592 | -0.178585 | 3.764358  |
| O | -4.575196 | -2.589047 | 6.205560  |
| O | -0.726623 | 2.454455  | -2.447792 |
| O | 2.412907  | -1.192293 | -2.435664 |
| H | 1.093595  | -1.994454 | -0.409750 |
| H | -0.857488 | -2.125966 | 1.020060  |
| H | -2.044996 | 0.629301  | 1.623117  |
| H | -3.298696 | 0.889428  | 3.561971  |
| H | -4.499455 | 0.004387  | 5.525705  |
| H | -3.235535 | -3.963455 | 4.510193  |
| H | -2.038932 | -3.093848 | 2.547648  |
| H | -1.762133 | 1.247422  | -0.453239 |
| H | 1.374239  | 1.101592  | -3.368380 |
| H | -5.020634 | -1.893676 | 6.713323  |
| H | -0.019744 | 2.963193  | -2.914041 |
| H | 2.739694  | -0.753491 | -3.235574 |

SCF energy=-5039.8457118 u.a.

**Inclusion complex with “mirror” twisted resveratrol (CTWm):**

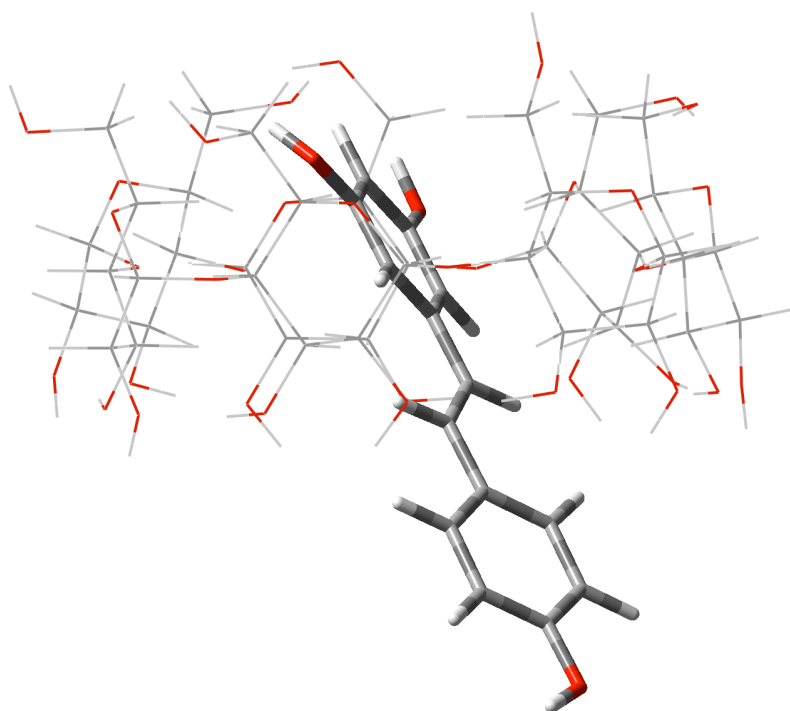

176

|   |           |           |           |
|---|-----------|-----------|-----------|
| C | -1.574554 | -0.020082 | -0.732972 |
| C | -0.919890 | 0.870601  | -1.581669 |
| C | 0.442940  | 1.114386  | -1.381155 |
| C | 1.139946  | 0.463456  | -0.366892 |
| C | 0.474299  | -0.423229 | 0.485853  |
| C | -0.889495 | -0.665008 | 0.293343  |
| C | 1.166689  | -1.123103 | 1.578174  |
| C | 2.325095  | -0.741153 | 2.133536  |
| C | 3.062362  | -1.425025 | 3.200638  |
| C | 2.690353  | -2.673817 | 3.722286  |
| C | 3.421304  | -3.277735 | 4.729358  |
| C | 4.555408  | -2.645826 | 5.244647  |
| C | 4.947497  | -1.409014 | 4.738916  |
| C | 4.205531  | -0.813103 | 3.727901  |
| O | 5.234290  | -3.287783 | 6.232988  |
| O | 1.135855  | 1.962123  | -2.179997 |
| O | -2.902038 | -0.300798 | -0.862621 |
| H | -1.439142 | -1.327781 | 0.952383  |
| H | 0.662782  | -2.014072 | 1.942168  |
| H | 2.793054  | 0.176809  | 1.783689  |
| H | 4.519289  | 0.151759  | 3.339733  |
| H | 5.831104  | -0.915311 | 5.133465  |
| H | 3.131592  | -4.244579 | 5.127416  |
| H | 1.817794  | -3.192509 | 3.335704  |
| H | 2.200344  | 0.658028  | -0.263943 |
| H | -1.452845 | 1.370762  | -2.384578 |
| H | 5.996305  | -2.753227 | 6.504069  |
| H | 0.536723  | 2.644556  | -2.570730 |
| H | -3.262856 | 0.148461  | -1.641290 |
| C | -6.173606 | 2.404898  | 0.805551  |

|   |           |           |           |
|---|-----------|-----------|-----------|
| C | -6.488532 | 1.551652  | 2.032651  |
| O | -5.941486 | 2.176753  | 3.183671  |
| C | -5.921719 | 0.157783  | 1.851052  |
| O | -6.325256 | -0.624596 | 2.953508  |
| C | -6.355558 | -0.465392 | 0.528505  |
| O | -5.509687 | -1.595102 | 0.385419  |
| C | -6.124325 | 0.513874  | -0.619300 |
| O | -6.728572 | 1.779805  | -0.328432 |
| C | -6.697308 | 0.084626  | -1.953346 |
| O | -6.432365 | 1.079021  | -2.946316 |
| C | -6.002104 | -2.830647 | -0.043396 |
| C | -5.592804 | -3.875693 | 0.995490  |
| O | -6.077117 | -3.462986 | 2.266443  |
| C | -4.083612 | -4.043972 | 1.016627  |
| O | -3.796106 | -5.121203 | 1.881099  |
| C | -3.563018 | -4.278763 | -0.391625 |
| O | -2.141603 | -4.317038 | -0.309177 |
| C | -4.031862 | -3.167668 | -1.325283 |
| O | -5.473776 | -3.169326 | -1.303606 |
| C | -3.551451 | -3.326501 | -2.765406 |
| O | -3.427862 | -4.667766 | -3.204995 |
| C | -1.480322 | -5.447086 | -0.795412 |
| C | -0.468273 | -5.921849 | 0.245264  |
| O | -1.140483 | -6.109257 | 1.478528  |
| C | 0.678908  | -4.939213 | 0.380231  |
| O | 1.600367  | -5.504118 | 1.284391  |
| C | 1.273420  | -4.690947 | -0.997720 |
| O | 2.350703  | -3.777332 | -0.847379 |
| C | 0.188852  | -4.147136 | -1.927109 |
| O | -0.831127 | -5.167684 | -2.022636 |
| C | 0.685204  | -3.802934 | -3.329676 |
| O | 1.717421  | -4.646798 | -3.801839 |
| C | 3.613795  | -4.170075 | -1.301942 |
| C | 4.652701  | -3.912794 | -0.218930 |
| O | 4.259528  | -4.572102 | 0.974389  |
| C | 4.822167  | -2.428531 | 0.030195  |
| O | 5.869457  | -2.309354 | 0.966269  |
| C | 5.087826  | -1.666357 | -1.263611 |
| O | 4.972558  | -0.278192 | -0.966096 |
| C | 4.033135  | -2.038620 | -2.311465 |
| O | 3.980076  | -3.465760 | -2.467170 |
| C | 4.305527  | -1.468499 | -3.682161 |
| O | 3.161955  | -1.734618 | -4.477679 |
| C | 6.084619  | 0.574241  | -1.085874 |
| C | 6.324458  | 1.281331  | 0.245509  |
| O | 6.609615  | 0.336212  | 1.263897  |
| C | 5.103741  | 2.101026  | 0.607561  |
| O | 5.376172  | 2.727061  | 1.842852  |
| C | 4.783135  | 3.086061  | -0.503692 |
| O | 3.500222  | 3.630676  | -0.211151 |
| C | 4.730132  | 2.389032  | -1.869948 |
| O | 5.875588  | 1.546417  | -2.074633 |
| C | 4.685374  | 3.376171  | -3.014481 |
| O | 5.803404  | 4.245761  | -2.923297 |
| C | 3.338114  | 5.015685  | -0.095419 |
| C | 2.718256  | 5.331394  | 1.264233  |

|   |           |           |           |
|---|-----------|-----------|-----------|
| O | 3.538279  | 4.797534  | 2.293841  |
| C | 1.303939  | 4.782803  | 1.360186  |
| O | 0.798559  | 5.183489  | 2.615245  |
| C | 0.484301  | 5.312566  | 0.197578  |
| O | -0.800137 | 4.696011  | 0.259979  |
| C | 1.179313  | 4.992916  | -1.129419 |
| O | 2.511161  | 5.525552  | -1.111977 |
| C | 0.461507  | 5.582705  | -2.322543 |
| O | 0.252880  | 6.969769  | -2.102597 |
| C | -1.927384 | 5.515349  | 0.075593  |
| C | -2.752459 | 5.558907  | 1.361395  |
| O | -1.912601 | 5.924096  | 2.445249  |
| C | -3.422616 | 4.225789  | 1.627482  |
| O | -4.230413 | 4.396250  | 2.770109  |
| C | -4.224086 | 3.802516  | 0.405491  |
| O | -4.785216 | 2.530457  | 0.683029  |
| C | -3.305725 | 3.750046  | -0.819735 |
| O | -2.721098 | 5.049197  | -0.987401 |
| C | -4.013691 | 3.435746  | -2.138241 |
| O | -3.893670 | 2.061545  | -2.487788 |
| H | -6.649731 | 3.385729  | 0.878034  |
| H | -7.580093 | 1.489208  | 2.123752  |
| H | -4.826905 | 0.243270  | 1.816919  |
| H | -7.408150 | -0.769840 | 0.588603  |
| H | -5.047836 | 0.651305  | -0.718386 |
| H | -6.224413 | -0.841397 | -2.285857 |
| H | -7.778877 | -0.079822 | -1.874216 |
| H | -7.088675 | -2.802242 | -0.161387 |
| H | -6.047662 | -4.834112 | 0.715299  |
| H | -3.637288 | -3.113485 | 1.394880  |
| H | -3.939326 | -5.235217 | -0.769183 |
| H | -3.683630 | -2.196238 | -0.962607 |
| H | -4.274698 | -2.822315 | -3.414436 |
| H | -2.597157 | -2.798129 | -2.867215 |
| H | -2.192988 | -6.244583 | -1.017527 |
| H | -0.056437 | -6.877912 | -0.102942 |
| H | 0.289250  | -3.987111 | 0.766338  |
| H | 1.640911  | -5.632084 | -1.418733 |
| H | 3.607964  | -5.225288 | -1.587141 |
| H | 5.608262  | -4.322607 | -0.573056 |
| H | 3.882905  | -2.043665 | 0.446265  |
| H | 6.093224  | -1.897160 | -1.635099 |
| H | 6.968462  | 0.009427  | -1.394553 |
| H | 7.185553  | 1.948638  | 0.115030  |
| H | 4.250499  | 1.418699  | 0.705015  |
| H | 5.537691  | 3.878400  | -0.521769 |
| H | 4.298356  | 5.525050  | -0.210241 |
| H | 1.225191  | 3.906838  | -1.264833 |
| H | -0.492810 | 5.056171  | -2.441738 |
| H | 1.070443  | 5.408331  | -3.219244 |
| H | 0.383254  | 6.396592  | 0.296248  |
| H | -1.614222 | 6.519277  | -0.221600 |
| H | -2.513627 | 3.009534  | -0.658855 |
| H | -5.070561 | 3.715295  | -2.079553 |
| H | -3.543563 | 4.050397  | -2.913878 |
| H | -5.020299 | 4.534007  | 0.218637  |



|   |           |           |           |
|---|-----------|-----------|-----------|
| H | -2.646422 | 3.468284  | 1.807449  |
| H | -3.535427 | 6.318445  | 1.230459  |
| H | 1.341123  | 3.686768  | 1.289821  |
| H | 2.669209  | 6.422445  | 1.363658  |
| H | 3.819178  | 1.785570  | -1.918287 |
| H | 3.743425  | 3.931781  | -2.945528 |
| H | 4.691254  | 2.818479  | -3.960108 |
| H | 3.057551  | -1.676823 | -1.967211 |
| H | 5.201829  | -1.946386 | -4.098963 |
| H | 4.496462  | -0.393341 | -3.588836 |
| H | -0.263548 | -3.250027 | -1.490671 |
| H | 1.014675  | -2.759787 | -3.339970 |
| H | -0.169926 | -3.882835 | -4.011666 |
| H | -2.506928 | -4.933209 | -3.032062 |
| H | -4.771823 | 1.714928  | -2.769470 |
| H | -6.946530 | 1.860972  | -2.686508 |
| H | 6.538284  | 0.818796  | 2.104881  |
| H | 5.986050  | -1.361135 | 1.189033  |
| H | 2.442933  | -5.001757 | 1.239119  |
| H | -2.834199 | -5.300783 | 1.840778  |
| H | -0.452288 | -6.213438 | 2.156426  |
| H | -5.920923 | 1.506278  | 3.886077  |
| H | -5.663817 | -4.052314 | 2.918970  |
| H | 2.552824  | -4.162309 | -3.668062 |
| H | 4.631861  | 3.331868  | 2.053855  |
| H | -4.666060 | 3.542199  | 2.977758  |
| H | -0.179711 | 5.227993  | 2.563740  |
| H | 3.350623  | -1.456197 | -5.385768 |
| H | -0.280677 | 7.308982  | -2.835384 |
| H | 4.748678  | -4.141342 | 1.696815  |
| H | -2.431800 | 5.756445  | 3.250785  |
| H | 3.017039  | 4.849891  | 3.112225  |
| H | 5.689032  | 4.945225  | -3.581290 |
| H | -6.061649 | -1.551605 | 2.774969  |

SCF energy=-5039.8457118 u.a.

### **Details of TD-DFT electronic circular dichroism computations**

#### **Planar resveratrol (PL)**

| <b>Transition</b> | <b><math>\lambda</math> (nm)</b> | <b>Rotatory strength (length)<sup>a</sup></b> |
|-------------------|----------------------------------|-----------------------------------------------|
| 1                 | 313.49                           | 0.0057                                        |
| 2                 | 275.68                           | 0.0015                                        |
| 3                 | 260.9                            | -0.0023                                       |
| 4                 | 227.69                           | 0.0098                                        |
| 5                 | 221.27                           | -0.0003                                       |
| 6                 | 216.27                           | -0.0019                                       |
| 7                 | 214.64                           | 0.0005                                        |
| 8                 | 213.28                           | -0.0049                                       |
| 9                 | 211.23                           | -0.0006                                       |
| 10                | 210.21                           | -0.0129                                       |

#### **Twisted resveratrol (TW)**

| <b>Transition</b> | <b><math>\lambda</math> (nm)</b> | <b>Rotatory strength (length)<sup>a</sup></b> |
|-------------------|----------------------------------|-----------------------------------------------|
| 1                 | 302.37                           | 45.9596                                       |
| 2                 | 269.57                           | -8.7952                                       |
| 3                 | 257.78                           | 1.3439                                        |
| 4                 | 225.22                           | -10.2019                                      |
| 5                 | 220.64                           | 1.0663                                        |
| 6                 | 215.08                           | 54.0411                                       |
| 7                 | 213.83                           | 17.4163                                       |
| 8                 | 212.31                           | 0.7012                                        |
| 9                 | 210.21                           | -35.6106                                      |
| 10                | 207.68                           | -60.8537                                      |

### Mirror image of twisted resveratrol (TWm)

| Transition | $\lambda$ (nm) | Rotatory strength (length) <sup>a</sup> |
|------------|----------------|-----------------------------------------|
| 1          | 302.37         | -45.9596                                |
| 2          | 269.57         | 8.7951                                  |
| 3          | 257.78         | -1.3437                                 |
| 4          | 225.22         | 10.2025                                 |
| 5          | 220.64         | -1.0662                                 |
| 6          | 215.08         | -54.0421                                |
| 7          | 213.83         | -17.4157                                |
| 8          | 212.31         | -0.7011                                 |
| 9          | 210.21         | 35.6112                                 |
| 10         | 207.68         | 60.8538                                 |

### Inclusion complex with planar resveratrol (CPL)

| Transition | $\lambda$ (nm) | Rotatory strength (length) <sup>a</sup> |
|------------|----------------|-----------------------------------------|
| 1          | 310.78         | 31.6071                                 |
| 2          | 274.59         | 0.6021                                  |
| 3          | 258.67         | 9.8039                                  |
| 4          | 228.09         | 5.1736                                  |
| 5          | 223.84         | 15.7318                                 |
| 6          | 219.01         | -56.026                                 |
| 7          | 214.58         | -10.8757                                |
| 8          | 211.05         | 55.7326                                 |
| 9          | 209.15         | 67.0325                                 |
| 10         | 207.7          | -3.0549                                 |

**Inclusion complex with twisted resveratrol (CTW)**

| <b>Transition</b> | <b><math>\lambda</math> (nm)</b> | <b>Rotatory strength (length)<sup>a</sup></b> |
|-------------------|----------------------------------|-----------------------------------------------|
| 1                 | 304.88                           | 70.3821                                       |
| 2                 | 272                              | -7.0984                                       |
| 3                 | 257.8                            | 10.5935                                       |
| 4                 | 226.17                           | -4.8249                                       |
| 5                 | 222.72                           | 6.5274                                        |
| 6                 | 216.12                           | 23.4063                                       |
| 7                 | 212.43                           | 15.7362                                       |
| 8                 | 210.74                           | -36.4473                                      |
| 9                 | 207.59                           | 42.8367                                       |
| 10                | 205.61                           | 2.9915                                        |

**Inclusion complex of the mirror image of twisted resveratrol (CTWm)**

| <b>Transition</b> | <b><math>\lambda</math> (nm)</b> | <b>Rotatory strength (length)<sup>a</sup></b> |
|-------------------|----------------------------------|-----------------------------------------------|
| 1                 | 303.95                           | -91.4705                                      |
| 2                 | 274.98                           | 9.7889                                        |
| 3                 | 258.39                           | -10.4871                                      |
| 4                 | 227.41                           | 11.3318                                       |
| 5                 | 223.45                           | -6.9053                                       |
| 6                 | 216.08                           | -24.2487                                      |
| 7                 | 213.05                           | -94.2795                                      |
| 8                 | 209.66                           | 83.654                                        |
| 9                 | 209.35                           | -3.4615                                       |
| 10                | 208.18                           | 8.2437                                        |

**Charge comparison between PL, TW, CPL, CTW in ground and excited states**

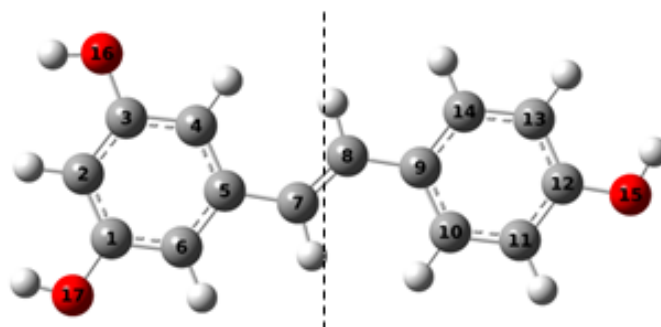

**Fig. 12** Labelled resveratrol

**Table 2.** NPA (Natural Population Analysis) charges of resveratrol atoms in free resveratrol (PL and TW) and in the complexes (CPL and CTW) in their ground ( $S_0$ ) and first excited ( $S_1$ ) electronic states.

|                              | PL      |         | TW      |         | CPL     |          | CTW     |         |
|------------------------------|---------|---------|---------|---------|---------|----------|---------|---------|
|                              | $S_0$   | $S_1$   | $S_0$   | $S_1$   | $S_0$   | $S_1$    | $S_0$   | $S_1$   |
| C1                           | 0.3354  | 0.3246  | 0.3345  | 0.3281  | 0.3217  | 0.30486  | 0.3278  | 0.3130  |
| C2                           | -0.3962 | -0.4082 | -0.3911 | -0.4089 | -0.4083 | -0.40933 | -0.3993 | -0.4025 |
| C3                           | 0.3363  | 0.3332  | 0.3356  | 0.3312  | 0.3777  | 0.36982  | 0.3382  | 0.3297  |
| C4                           | -0.3236 | -0.3431 | -0.3227 | -0.3432 | -0.3244 | -0.33452 | -0.3338 | -0.3421 |
| C5                           | -0.0311 | -0.0515 | -0.0280 | -0.0338 | -0.0351 | -0.06602 | 0.0112  | -0.0197 |
| C6                           | -0.3201 | -0.3025 | -0.3192 | -0.3085 | -0.3205 | -0.30978 | -0.3382 | -0.3308 |
| C7                           | -0.2264 | -0.2402 | -0.2398 | -0.2563 | -0.2320 | -0.21987 | -0.2455 | -0.2311 |
| C8                           | -0.2063 | -0.2315 | -0.1903 | -0.2118 | -0.1898 | -0.24512 | -0.1938 | -0.2491 |
| C9                           | -0.1143 | -0.0780 | -0.1243 | -0.0995 | -0.1305 | -0.07688 | -0.1301 | -0.0724 |
| C10                          | -0.2058 | -0.2309 | -0.2020 | -0.2287 | -0.1944 | -0.23416 | -0.1988 | -0.2417 |
| C11                          | -0.2948 | -0.2751 | -0.2932 | -0.2785 | -0.2959 | -0.27996 | -0.2954 | -0.2779 |
| C12                          | 0.3162  | 0.3143  | 0.3153  | 0.3240  | 0.3175  | 0.33308  | 0.3172  | 0.3341  |
| C13                          | -0.3249 | -0.3233 | -0.3185 | -0.3227 | -0.3201 | -0.31848 | -0.3202 | -0.3202 |
| C14                          | -0.1915 | -0.1778 | -0.2013 | -0.1850 | -0.1928 | -0.16613 | -0.1938 | -0.1651 |
| O15                          | -0.7311 | -0.7077 | -0.7299 | -0.7052 | -0.7290 | -0.69866 | -0.7293 | -0.6970 |
| O16                          | -0.7324 | -0.7317 | -0.7426 | -0.7431 | -0.7800 | -0.78114 | -0.7598 | -0.7613 |
| O17                          | -0.7316 | -0.7326 | -0.7322 | -0.7347 | -0.7276 | -0.72894 | -0.7273 | -0.7288 |
| $\sum q_{H(2,4,6,7,16,17)}$  | 2.0539  | 2.0438  | 2.0641  | 2.0567  | 2.0398  | 2.0315   | 2.0551  | 2.0453  |
| $\sum q_{H(10,11,13,14,15)}$ | 1.7882  | 1.8183  | 1.7855  | 1.8198  | 1.7747  | 1.7974   | 1.7794  | 1.8024  |
| $q(2OH)$                     | -0.0358 | -0.1083 | -0.0414 | -0.1124 | -0.0887 | -0.1434  | -0.0714 | -0.1283 |
| $q(1OH)$                     | 0.0358  | 0.1083  | 0.0415  | 0.1124  | 0.0397  | 0.1111   | 0.0352  | 0.1131  |
| $q_{TOTAL}$                  | 0.0000  | 0.0000  | 0.0000  | 0.0000  | -0.0490 | -0.0323  | -0.0362 | -0.0152 |

To help the interpretation of the charge distribution both in the ground and excited states, we have added charges dividing the molecule as represented in the figure above and according to the expressions:

$$q(2OH) = \sum q(C1, C2, C3, C4, C5, C7, O16, O17) + \sum q(H_{C2}, H_{C4}, H_{C3}, H_{C4}, H_{C5}, H_{C7}, H_{O16}, H_{O17})$$

$$q(1OH) = \sum q(C8, C9, C10, C11, C12, C13, C14, O15) + \sum q(H_{C8}, H_{C9}, H_{C10}, H_{C11}, H_{C12}, H_{C13}, H_{C14}, H_{O15})$$

$q_{\text{TOTAL}}$  represents the total charge of the resveratrol unit: Zero values correspond to free resveratrol and the negative values in the complexes indicate the existence of charge transfer from the  $\beta$ -CyD towards resveratrol.
